Uncovering QTL and candidate genes for tomato fruit cuticular lipid composition using the *Solanum pennellii* introgression line population

Josefina-Patricia Fernandez-Moreno, Dorit Levy-Samoha, Sergey Malitsky, Antonio J. Monforte, Diego Orzaez, Asaph Aharoni, Antonio Granell

**SUPPLEMENTAL DATA**

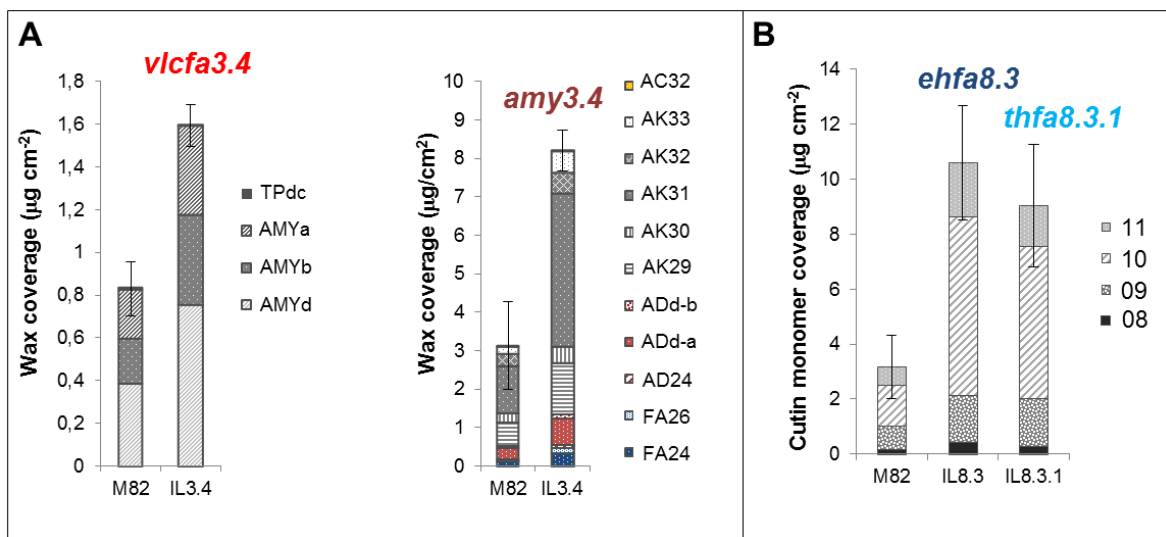

**Supplementary Figure S1 Validated QTLs associated with the main cuticular lipid traits of *S. pennellii* fruits during the second season. A.** Wax related QTLs from IL3.4. **B.** Cutin-related QTLs from IL8.3 and IL8.3.1. Abbreviations: vlcf, very-long-chain fatty acids; amy, amyriins; ehfa, epoxyhydroxy fatty acids; thfa, trihydroxy fatty acid; AC, alcohol; AD, aldehyde; AK, alkane; FA, fatty acid; ADd, aldehyde derivative; and TPd, triterpenoid derivative. See cutin monomers #08 to #11 in Figure 1. For more genetic marker information see Supplementary Table S1. Error bar, standard error (n = 3).

**Supplementary Table S1** DNA markers used to screen cuticular lipid components in the *S. pennellii* IL population.

| M# | Genetic Marker                   | Chromosome | Introgression Line Mapped |         |       | IL BIN <sup>a</sup> | Distance MB | Distance bp | Into gene...   | Upstream from gene... |
|----|----------------------------------|------------|---------------------------|---------|-------|---------------------|-------------|-------------|----------------|-----------------------|
| 1  | solcap_snp_sl_15058              | ch01       | IL1.1.3                   |         |       | 1A                  | 0.05        | 45434       | -              | Solyc01g005030        |
| 2  | solcap_snp_sl_15049              | ch01       | IL1.1.3                   | IL1.1.2 | IL1.1 | 1A/1B               | 0.30        | 303202      | Solyc01g005430 | -                     |
| 3  | solcap_snp_sl_24801              | ch01       | IL1.1.3                   | IL1.1.2 | IL1.1 | 1B                  | 0.66        | 663658      | Solyc01g006000 | -                     |
| 4  | solcap_snp_sl_60393              | ch01       | IL1.1.3                   | IL1.1.2 | IL1.1 | 1B/1C               | 1.12        | 1118868     | Solyc01g006540 | -                     |
| 5  | solcap_snp_sl_60143              | ch01       | IL1.1.3                   |         | IL1.1 | 1C                  | 2.51        | 2507736     | Solyc01g008420 | -                     |
| 6  | solcap_snp_sl_59964              | ch01       | IL1.1.3                   |         | IL1.1 | 1C/1D               | 3.59        | 3591306     | Solyc01g009380 | -                     |
| 7  | solcap_snp_sl_20438              | ch01       | IL1.1.3                   |         | IL1.1 | 1D                  | 3.90        | 3899743     | Solyc01g009660 | -                     |
| 8  | solcap_snp_sl_59897              | ch01       | IL1.1.3                   |         | IL1.1 | 1D/1E               | 4.40        | 4404784     | Solyc01g009870 | -                     |
| 9  | solcap_snp_sl_41438              | ch01       |                           |         | IL1.1 | 1E                  | 45.89       | 45889601    | Solyc01g049690 | -                     |
| 10 | solcap_snp_sl_27832              | ch01       |                           |         | IL1.1 | 1E/1F               | 85.90       | 85901981    | Solyc01g094400 | -                     |
| 11 | 0426_solcap_snp_sl_100368        | ch01       |                           |         |       | 1F                  | 86.54       |             | Solyc01g095180 | -                     |
| 12 | solcap_snp_sl_28225              | ch01       |                           |         | IL1.2 | 1F/1G               | 87.59       | 87591685    | Solyc01g096510 | -                     |
| 13 | solcap_snp_sl_28247              | ch01       |                           |         | IL1.2 | 1G/1H               | 87.70       | 87703118    | Solyc01g096670 | -                     |
| 14 | solcap_snp_sl_43902              | ch01       |                           |         | IL1.3 | 1H                  | 88.53       | 88528976    | Solyc01g097830 | -                     |
| 15 | solcap_snp_sl_40154              | ch01       |                           |         | IL1.3 | 1H/1I               | 91.76       | 91756586    | Solyc01g103090 | -                     |
| 16 | solcap_snp_sl_40303              | ch01       |                           |         | IL1.3 | 1I                  | 92.48       | 92478179    | Solyc01g104000 | -                     |
| 17 | 0245_solcap_snp_sl_100427        | ch01       |                           |         |       | 1I/1J               | 93.90       | 93899146    | -              | Solyc01g105790        |
| 18 | solcap_snp_sl_54854              | ch01       |                           |         | IL1.3 | 1J                  | 95.75       | 95746081    | Solyc01g108420 | -                     |
| 19 | 0184_solcap_snp_sl_100500        | ch01       |                           |         |       | 1J/1K               | 97.10       | 97104537    | Solyc01g109980 | -                     |
| 20 | 0228_solcap_snp_sl_100374        | ch01       |                           |         |       | 1K                  | 97.89       | 97893381    | Solyc01g111710 | -                     |
| 21 | solcap_snp_sl_53612              | ch01       |                           |         |       | 1K                  | 98.41       | 98411966    | Solyc01g112320 | -                     |
| 22 | solcap_snp_sl_70010*             | ch02       | IL2.1.1                   | IL2.1   |       | 2A                  | 2.17        | 2166200     | -              | Solyc02g055550        |
| 23 | solcap_snp_sl_2559               | ch02       | IL2.1.1                   | IL2.1   |       | 2A                  | 15.08       | 15081835    | Solyc02g014090 | -                     |
| 24 | solcap_snp_sl_7413               | ch02       | IL2.1.1                   | IL2.1   |       | 2A/2B               | 25.88       | 25876791    | Solyc02g030450 | -                     |
| 25 | solcap_snp_sl_12647              | ch02       |                           | IL2.1   |       | 2B                  | 30.58       | 30577418    | Solyc02g036360 | -                     |
| 26 | 0283_solcap_snp_sl_100390        | ch02       |                           | IL2.1   | IL2.2 | 2B/2C               | 35.33       | 35331701    | Solyc02g063270 | -                     |
| 27 | solcap_snp_sl_36484              | ch02       |                           | IL2.1   | IL2.2 | 2C                  | 35.74       | 35735971    | Solyc02g064650 | -                     |
| 28 | Le009381_51_solcap_snp_sl_100681 | ch02       |                           | IL2.1   | IL2.2 | 2C/2D               | 36.24       | 36248146    | Solyc02g065080 | -                     |
| 29 | solcap_snp_sl_15696              | ch02       |                           |         | IL2.2 | 2D                  | 36.79       | 36790779    | Solyc02g065630 | -                     |
| 30 | solcap_snp_sl_36373              | ch02       |                           |         | IL2.2 | 2D/2E               | 36.91       | 36912602    | Solyc02g065770 | -                     |
| 31 | solcap_snp_sl_20325              | ch02       |                           |         | IL2.2 | 2E                  | 37.24       | 37243652    | Solyc02g066990 | -                     |
| 32 | 0450_solcap_snp_sl_100578        | ch02       |                           |         | IL2.2 | 2E/2F               | 37.90       | 37900875    | Solyc02g067790 | -                     |
| 33 | solcap_snp_sl_8464               | ch02       |                           |         | IL2.3 | 2F                  | 38.54       | 38544729    | Solyc02g068590 | -                     |
| 34 | solcap_snp_sl_33547              | ch02       |                           |         | IL2.3 | 2F/2G               | 39.24       | 39240130    | Solyc02g069310 | -                     |
| 35 | solcap_snp_sl_29779              | ch02       |                           |         | IL2.3 | 2G                  | 43.55       | 43551066    | Solyc02g078930 | -                     |
| 36 | solcap_snp_sl_18432              | ch02       |                           |         | IL2.3 | 2G/2H               | 45.04       | 45037985    | Solyc02g080970 | -                     |
| 37 | solcap_snp_sl_18448              | ch02       |                           |         | IL2.3 | 2H                  | 45.32       | 45323529    | Solyc02g081310 | -                     |
| 38 | 0541_solcap_snp_sl_18432         | ch02       |                           |         | IL2.3 | 2H/2I               | 45.52       | 45518495    | Solyc02g081640 | -                     |

|    |                                        |      |         |       |       |       |         |       |         |  |          |       |          |                |                |
|----|----------------------------------------|------|---------|-------|-------|-------|---------|-------|---------|--|----------|-------|----------|----------------|----------------|
| 39 | solcap_snp_sl_4831<br>CL016442-        | ch02 |         |       |       | IL2.4 | IL2.5   |       |         |  | 2I       | 47.22 | 47218361 | Solyc02g083990 | -              |
| 40 | 0124_solcap_snp_sl_1<br>00410          | ch02 |         |       |       | IL2.4 | IL2.5   |       |         |  | 2I/2J    | 48.16 |          | Solyc02g085180 | -              |
| 41 | solcap_snp_sl_36297                    | ch02 |         |       |       |       | IL2.5   |       |         |  | 2J       | 50.57 | 50566459 | Solyc02g088480 | -              |
| 42 | solcap_snp_sl_67138                    | ch02 |         |       |       |       | IL2.5   | IL2.6 |         |  | 2J/2K    | 51.85 | 51852193 | Solyc02g090230 | -              |
| 43 | solcap_snp_sl_66965                    | ch02 |         |       |       |       | IL2.5   | IL2.6 |         |  | 2K       | 52.77 | 52766779 | Solyc02g091490 | -              |
| 44 | solcap_snp_sl_58462                    | ch02 |         |       |       |       | IL2.5   | IL2.6 | IL2.6.5 |  | 2K/2L    | 53.97 | 53969561 | Solyc02g093010 | -              |
| 45 | solcap_snp_sl_20052                    | ch02 |         |       |       |       | IL2.5   | IL2.6 | IL2.6.5 |  | 2L       | 54.11 | 54107130 | Solyc02g093160 | -              |
| 46 | solcap_snp_sl_20051                    | ch02 |         |       |       |       | IL2.5   | IL2.6 | IL2.6.5 |  | 2L/2M    | 54.12 | 54118621 | Solyc02g093180 | -              |
| 47 | solcap_snp_sl_47897                    | ch02 |         |       |       |       |         | IL2.6 | IL2.6.5 |  | 2M       | 55.03 | 55033465 | Solyc02g094510 | -              |
| 48 | solcap_snp_sl_47880                    | ch02 |         |       |       |       |         | IL2.6 | IL2.6.5 |  | 2M       | 55.24 | 55238304 | Solyc02g094640 | -              |
| 49 | solcap_snp_sl_63048                    | ch03 | IL3.1   |       |       |       |         |       |         |  | 3A       | 0.07  | 71076    | Solyc03g005100 | -              |
| 50 | solcap_snp_sl_63184                    | ch03 | IL3.1   |       |       |       |         |       |         |  | 3A       | 0.75  | 748576   | Solyc03g006060 | -              |
| 51 | solcap_snp_sl_63290                    | ch03 | IL3.1   | IL3.2 |       |       |         |       |         |  | 3A/3B    | 1.39  | 1390288  | Solyc03g006870 | -              |
| 52 | solcap_snp_sl_26399                    | ch03 |         | IL3.2 |       |       |         |       |         |  | 3B       | 6.40  | 6396398  | Solyc03g034440 | -              |
| 53 | solcap_snp_sl_30006                    | ch03 |         | IL3.2 | IL3.3 |       |         |       |         |  | 3B/3C    | 11.51 | 11510772 | Solyc03g045090 | -              |
| 54 | solcap_snp_sl_29993<br>CL009162-       | ch03 |         | IL3.2 | IL3.3 |       |         |       |         |  | 3C       | 28.89 | 28855686 | Solyc03g059360 | -              |
| 55 | 0240_solcap_snp_sl_1<br>00138          | ch03 |         | IL3.2 | IL3.3 |       |         |       |         |  | 3C/3D    | 60.59 |          | Solyc03g098230 | -              |
| 56 | solcap_snp_sl_65890                    | ch03 |         |       | IL3.3 |       |         |       |         |  | 3D       | 61.07 | 61069454 | Solyc03g098790 | -              |
| 57 | solcap_snp_sl_58651                    | ch03 |         |       | IL3.3 | IL3.4 |         |       |         |  | 3D/3E    | 61.63 | 61632372 | Solyc03g110900 | -              |
| 58 | solcap_snp_sl_62473                    | ch03 |         |       | IL3.3 | IL3.4 |         |       |         |  | 3E       | 63.31 | 63304984 | Solyc03g113000 | -              |
| 59 | solcap_snp_sl_20830                    | ch03 |         |       | IL3.3 | IL3.4 |         |       |         |  | 3E/3F    | 66.54 | 66536917 | Solyc03g117370 | -              |
| 60 | solcap_snp_sl_9137                     | ch03 |         |       |       | IL3.4 |         |       |         |  | 3F       | 66.72 | 66720829 | Solyc03g117600 | -              |
| 61 | CL015122-0237                          | ch03 |         |       |       | IL3.4 | IL3.5   |       |         |  | 3F/3G    | 67.22 | 67226370 | Solyc03g118310 | -              |
| 62 | solcap_snp_sl_61677                    | ch03 |         |       |       | IL3.4 | IL3.5   |       |         |  | 3G       | 67.47 | 67466637 | Solyc03g118620 | -              |
| 63 | solcap_snp_sl_61632                    | ch03 |         |       |       | IL3.4 | IL3.5   |       |         |  | 3G/3H    | 67.63 | 67627318 | Solyc03g118820 | -              |
| 64 | solcap_snp_sl_33933                    | ch03 |         |       |       |       | IL3.5   |       |         |  | 3H       | 68.83 | 68825599 | Solyc03g120430 | -              |
| 65 | solcap_snp_sl_67626                    | ch03 |         |       |       |       | IL3.5   |       |         |  | 3H       | 70.72 | 70719370 | Solyc03g124010 | -              |
| 66 | solcap_snp_sl_45224                    | ch04 | IL4.1.1 | IL4.1 |       |       |         |       |         |  | 4A       | 0.04  | 35288    | Solyc04g005030 | -              |
| 67 | solcap_snp_sl_45276                    | ch04 | IL4.1.1 | IL4.1 |       |       |         |       |         |  | 4A       | 0.32  | 323820   | Solyc04g005480 | -              |
| 68 | solcap_snp_sl_45332                    | ch04 | IL4.1.1 | IL4.1 |       |       |         |       |         |  | 4A/4B    | 0.59  | 585828   | Solyc04g005910 | -              |
| 69 | solcap_snp_sl_63899<br>CL016761-       | ch04 |         | IL4.1 |       |       |         |       |         |  | 4B       | 1.24  | 1242445  | Solyc04g007560 | -              |
| 70 | 0264_solcap_snp_sl_1<br>00460          | ch04 |         | IL4.1 | IL4.2 |       |         |       |         |  | 4B/4C    | 1.97  | 1974622  | -              | Solyc04g008290 |
| 71 | solcap_snp_sl_64358                    | ch04 |         | IL4.1 | IL4.2 |       |         |       |         |  | 4C       | 3.51  | 3505857  | -              | Solyc04g010190 |
| 72 | solcap_snp_sl_41575                    | ch04 |         | IL4.1 | IL4.2 |       |         |       |         |  | 4C/4D    | 4.94  | 4942620  | Solyc04g014680 | -              |
| 73 | solcap_snp_sl_41609                    | ch04 |         | IL4.1 | IL4.2 | IL4.3 |         |       |         |  | 4D       | 5.30  | 5295726  | Solyc04g015130 | -              |
| 74 | solcap_snp_sl_16978                    | ch04 |         | IL4.1 | IL4.2 | IL4.3 | IL4.3.2 |       |         |  | 4D/4E    | 5.53  | 5529704  | Solyc04g015340 | -              |
| 75 | solcap_snp_sl_18763                    | ch04 |         |       | IL4.2 | IL4.3 | IL4.3.2 |       |         |  | 4E       | 30.38 | 30381093 | Solyc04g024520 | -              |
| 76 | solcap_snp_sl_23472                    | ch04 |         |       | IL4.2 | IL4.3 | IL4.3.2 |       |         |  | 4E/4F    | 55.73 | 55727496 | Solyc04g064550 | -              |
| 77 | solcap_snp_sl_2189                     | ch04 |         |       |       | IL4.3 | IL4.3.2 |       |         |  | 4F       | 57.78 | 57782525 | Solyc04g070970 | -              |
| 78 | solcap_snp_sl_43402                    | ch04 |         |       |       | IL4.3 | IL4.3.2 |       |         |  | 4F       | 59.32 | 59322491 | Solyc04g072290 | -              |
| 79 | solcap_snp_sl_47229                    | ch04 |         |       |       |       |         | IL4.4 |         |  | 4H       | 63.22 | 63226704 | Solyc04g078490 | -              |
| 80 | solcap_snp_sl_47615                    | ch04 |         |       |       |       |         | IL4.4 |         |  | 4H       | 64.83 | 64829060 | Solyc04g080730 | -              |
| 81 | solcap_snp_sl_4176<br>CL015995-        | ch04 |         |       |       |       |         | IL4.4 |         |  | 4H       | 66.45 | 66453691 | -              | Solyc04g083000 |
| 82 | 0443_solcap_snp_sl_1<br>00344          | ch05 | IL5.1   |       |       |       |         |       |         |  | 5A(1)    | 0.02  | 2874     | Solyc05g005000 | -              |
| 83 | solcap_snp_sl_69219                    | ch05 | IL5.1   |       |       |       |         |       |         |  | 5A(1)    | 1.08  | 108012   | Solyc05g005100 | -              |
| 84 | solcap_snp_sl_52699<br>SGN-            | ch05 | IL5.1   | IL5.2 |       |       |         |       |         |  | 5A(1)/5B | 1.18  | 1184835  | Solyc05g006560 | -              |
| 85 | U567719_snp239_solc<br>ap_snp_sl_52710 | ch05 | IL5.1   | IL5.2 |       |       |         |       |         |  | 5B       | 1.21  | 1211190  | Solyc05g006680 | -              |
| 86 | solcap_snp_sl_52714                    | ch05 | IL5.1   | IL5.2 |       |       |         |       |         |  | 5B/5A(2) | 1.31  | 1311252  | Solyc05g006650 | -              |
| 87 | solcap_snp_sl_19103                    | ch05 | IL5.1   |       |       |       |         |       |         |  | 5A(2)    | 1.86  | 1861325  | Solyc05g007220 | -              |
| 88 | SGN-U566039_snp997                     | ch05 | IL5.1   |       |       |       |         |       |         |  | 5A(2)    | 2.23  | 2231292  | Solyc05g007770 | -              |
| 89 | solcap_snp_sl_51230                    | ch05 |         |       | IL5.3 |       |         |       |         |  | 5D       | 16.04 | 16037654 | Solyc05g016380 | -              |
| 90 | solcap_snp_sl_55302                    | ch05 |         |       | IL5.3 |       |         |       |         |  | 5D       | 35.40 | 35397812 | Solyc05g025650 | -              |
| 91 | solcap_snp_sl_37413                    | ch05 |         |       | IL5.3 | IL5.4 |         |       |         |  | 5D/5E    | 63.50 | 63498544 | Solyc05g053400 | -              |

|     |                                    |      |         |         |         |         |         |       |         |  |  |       |       |          |                |                |   |
|-----|------------------------------------|------|---------|---------|---------|---------|---------|-------|---------|--|--|-------|-------|----------|----------------|----------------|---|
| 92  | solcap_snp_sl_37514                | ch05 |         |         |         | IL5.4   |         |       |         |  |  | 5E    | 63.88 | 63880865 | -              | Solyc05g053850 | - |
| 93  | solcap_snp_sl_224                  | ch05 |         |         |         | IL5.4   |         | IL5.5 |         |  |  | 5E/5F | 64.09 | 64086547 | Solyc05g054120 | -              | - |
| 94  | solcap_snp_sl_37626                | ch05 |         |         |         | IL5.4   |         | IL5.5 |         |  |  | 5F    | 64.40 | 64403993 | Solyc05g054880 | -              | - |
| 95  | solcap_snp_sl_306                  | ch05 |         |         |         | IL5.4   |         | IL5.5 |         |  |  | 5F/5G | 64.79 | 64789300 | Solyc05g055010 | -              | - |
| 96  | solcap_snp_sl_37825                | ch05 |         |         |         |         |         | IL5.5 |         |  |  | 5G    | 65.27 | 65269905 | Solyc05g055760 | -              | - |
| 97  | solcap_snp_sl_37979                | ch05 |         |         |         |         |         | IL5.5 |         |  |  | 5G    | 65.77 | 65770270 | Solyc05g056500 | -              | - |
| 98  | solcap_snp_sl_23100                | ch06 | IL6.1   |         |         |         |         |       |         |  |  | 6A    | 0.04  | 37722    | Solyc06g005060 | -              | - |
| 99  | solcap_snp_sl_31170                | ch06 | IL6.1   |         |         |         |         |       |         |  |  | 6A    | 17.07 | 17071424 | Solyc06g018100 | -              | - |
| 100 | CL017670-0525_solcap_snp_sl_100614 | ch06 | IL6.1   | IL6.2   | IL6.2.2 |         |         |       |         |  |  | 6A/6B | 35.73 | 35725164 | Solyc06g052070 | -              | - |
| 101 | solcap_snp_sl_68935                | ch06 | IL6.1   | IL6.2   | IL6.2.2 |         |         |       |         |  |  | 6B    | 36.72 | 36716563 | Solyc06g053840 | -              | - |
| 102 | solcap_snp_sl_68976                | ch06 | IL6.1   | IL6.2   | IL6.2.2 |         |         |       |         |  |  | 6B/6C | 37.22 | 37216563 | Solyc06g054440 | -              | - |
| 103 | solcap_snp_sl_12646                | ch06 |         | IL6.2   | IL6.2.2 |         |         |       |         |  |  | 6C    | 39.29 | 39287820 | Solyc06g062280 | -              | - |
| 104 | solcap_snp_sl_27215                | ch06 |         | IL6.2   | IL6.2.2 |         |         |       |         |  |  | 6C/6D | 41.99 | 41994475 | Solyc06g066810 | -              | - |
| 105 | solcap_snp_sl_39163                | ch06 |         | IL6.2   |         |         |         |       |         |  |  | 6D    | 42.56 | 42561121 | Solyc06g065680 | -              | - |
| 106 | solcap_snp_sl_57574                | ch06 |         | IL6.2   |         | IL6.3   |         |       |         |  |  | 6D/6E | 44.82 | 44818656 | -              | Solyc06g072680 | - |
| 107 | solcap_snp_sl_57455                | ch06 |         | IL6.2   |         | IL6.3   |         |       |         |  |  | 6E    | 45.32 | 45311835 | Solyc06g073510 | -              | - |
| 108 | solcap_snp_sl_57352                | ch06 |         | IL6.2   |         | IL6.3   |         |       |         |  |  | 6E/6F | 45.95 | 45953573 | Solyc06g074330 | -              | - |
| 109 | solcap_snp_sl_57228                | ch06 |         |         |         | IL6.3   |         |       |         |  |  | 6F    | 46.79 | 46785478 | Solyc06g075370 | -              | - |
| 110 | solcap_snp_sl_54339                | ch06 |         |         |         | IL6.3   | IL6.4   |       |         |  |  | 6F/6G | 48.74 | 48740122 | Solyc06g083230 | -              | - |
| 111 | solcap_snp_sl_54259                | ch06 |         |         |         | IL6.3   | IL6.4   |       |         |  |  | 6G    | 49.10 | 49096703 | Solyc06g083760 | -              | - |
| 112 | solcap_snp_sl_54183                | ch06 |         |         |         | IL6.3   | IL6.4   |       |         |  |  | 6G    | 49.63 | 49631131 | Solyc06g084530 | -              | - |
| 113 | solcap_snp_sl_68725                | ch07 | IL7.1   | IL7.2   |         |         |         |       |         |  |  | 7A    | 0.07  | 68730    | Solyc07g005030 | -              | - |
| 114 | solcap_snp_sl_68398                | ch07 | IL7.1   | IL7.2   |         |         |         |       |         |  |  | 7A    | 1.56  | 1557551  | Solyc07g006690 | -              | - |
| 115 | solcap_snp_sl_68044                | ch07 | IL7.1   | IL7.2   |         |         |         |       |         |  |  | 7A/7B | 3.08  | 3078229  | Solyc07g008310 | -              | - |
| 116 | solcap_snp_sl_15775                | ch07 |         | IL7.2   |         |         |         |       |         |  |  | 7B    | 3.21  | 3207474  | Solyc07g008410 | -              | - |
| 117 | solcap_snp_sl_11082                | ch07 |         | IL7.2   | IL7.3   |         |         |       |         |  |  | 7B/7C | 3.46  | 3460132  | -              | Solyc07g008540 | - |
| 118 | solcap_snp_sl_55157                | ch07 |         | IL7.2   | IL7.3   |         |         |       |         |  |  | 7C    | 31.13 | 31132702 | Solyc07g026770 | -              | - |
| 119 | CL017617-0913_solcap_snp_sl_100601 | ch07 |         | IL7.2   | IL7.3   | IL7.4   |         |       |         |  |  | 7C/7D | 59.21 | 59211604 | Solyc07g048010 | -              | - |
| 120 | solcap_snp_sl_53455                | ch07 |         | IL7.2   | IL7.3   | IL7.4   |         |       |         |  |  | 7D    | 61.91 | 61906229 | Solyc07g053460 | -              | - |
| 121 | solcap_snp_sl_55514                | ch07 |         | IL7.2   | IL7.3   | IL7.4   | IL7.4.1 |       |         |  |  | 7D/7E | 63.64 | 63644286 | Solyc07g055700 | -              | - |
| 122 | solcap_snp_sl_37108                | ch07 |         |         |         | IL7.4   | IL7.4.1 |       |         |  |  | 7E    | 64.74 | 64739866 | Solyc07g061780 | -              | - |
| 123 | solcap_snp_sl_70925                | ch07 |         |         |         | IL7.4   | IL7.4.1 | IL7.5 |         |  |  | 7E/7F | 65.82 | 65817889 | Solyc07g063330 | -              | - |
| 124 | solcap_snp_sl_70865                | ch07 |         |         |         | IL7.4   | IL7.4.1 | IL7.5 |         |  |  | 7F    | 66.12 | 66119424 | Solyc07g063750 | -              | - |
| 125 | solcap_snp_sl_37065                | ch07 |         |         |         | IL7.4   | IL7.4.1 | IL7.5 | IL7.5.5 |  |  | 7F/7G | 66.41 | 66406912 | Solyc07g064130 | -              | - |
| 126 | solcap_snp_sl_70636                | ch07 |         |         |         | IL7.4   | IL7.4.1 | IL7.5 | IL7.5.5 |  |  | 7G    | 67.16 | 67162714 | Solyc07g065370 | -              | - |
| 127 | solcap_snp_sl_37030                | ch07 |         |         |         | IL7.4   | IL7.4.1 | IL7.5 | IL7.5.5 |  |  | 7G    | 67.83 | 67827948 | -              | Solyc07g066370 | - |
| 128 | CL015795-0319_solcap_snp_sl_100308 | ch08 | IL8.1.3 | IL8.1.1 | IL8.1   |         |         |       |         |  |  | 8A    | 0.03  | 28273    | Solyc08g005030 | -              | - |
| 129 | solcap_snp_sl_56672                | ch08 | IL8.1.3 | IL8.1.1 | IL8.1   |         |         |       |         |  |  | 8A    | 1.67  | 1667609  | Solyc08g007100 | -              | - |
| 130 | solcap_snp_sl_56922                | ch08 | IL8.1.3 | IL8.1.1 | IL8.1   |         |         |       |         |  |  | 8A/8B | 3.00  | 3003469  | Solyc08g008610 | -              | - |
| 131 | solcap_snp_sl_50349                | ch08 |         | IL8.1.1 | IL8.1   |         |         |       |         |  |  | 8B    | 29.10 | 29095157 | Solyc08g023270 | -              | - |
| 132 | solcap_snp_sl_4431                 | ch08 |         | IL8.1.1 | IL8.1   |         |         |       |         |  |  | 8B    | 53.23 | 53231057 | Solyc08g065320 | -              | - |
| 133 | solcap_snp_sl_48675                | ch08 |         |         |         | IL8.2.1 | IL8.2   |       |         |  |  | 8D    | 54.69 | 54694932 | Solyc08g066220 | -              | - |
| 134 | solcap_snp_sl_29394                | ch08 |         |         |         | IL8.2.1 | IL8.2   |       |         |  |  | 8D    | 58.13 | 58127626 | -              | Solyc08g069050 | - |
| 135 | solcap_snp_sl_25111                | ch08 |         |         |         | IL8.2.1 | IL8.2   |       |         |  |  | 8D/8E | 61.84 | 61842932 | Solyc08g077960 | -              | - |
| 136 | solcap_snp_sl_64977                | ch08 |         |         |         |         | IL8.2   |       |         |  |  | 8E    | 61.91 | 61910573 | Solyc08g078040 | -              | - |
| 137 | solcap_snp_sl_65030                | ch08 |         |         |         |         | IL8.2   | IL8.3 |         |  |  | 8E/8F | 62.13 | 62132704 | Solyc08g078320 | -              | - |
| 138 | solcap_snp_sl_65244                | ch08 |         |         |         |         | IL8.2   | IL8.3 |         |  |  | 8F    | 63.11 | 63109885 | Solyc08g079630 | -              | - |
| 139 | solcap_snp_sl_34811                | ch08 |         |         |         |         | IL8.2   | IL8.3 |         |  |  | 8F/8G | 63.52 | 63516877 | Solyc08g080190 | -              | - |
| 140 | solcap_snp_sl_34942                | ch08 |         |         |         |         |         | IL8.3 |         |  |  | 8G    | 64.63 | 64630487 | Solyc08g081640 | -              | - |
| 141 | solcap_snp_sl_65655                | ch08 |         |         |         |         |         | IL8.3 | IL8.3.1 |  |  | 8G/8H | 65.06 | 65055799 | Solyc08g082210 | -              | - |
| 142 | solcap_snp_sl_70252                | ch08 |         |         |         |         |         | IL8.3 | IL8.3.1 |  |  | 8H    | 65.48 | 65479618 | Solyc08g082800 | -              | - |
| 143 | solcap_snp_sl_70166                | ch08 |         |         |         |         |         | IL8.3 | IL8.3.1 |  |  | 8H    | 65.84 | 65836909 | Solyc08g083380 | -              | - |
| 144 | solcap_snp_sl_17547                | ch09 | IL9.1.2 | IL9.1   |         |         |         |       |         |  |  | 9A    | 0.05  | 48822    | Solyc09g005080 | -              | - |
| 145 | solcap_snp_sl_44783                | ch09 | IL9.1.2 | IL9.1   |         |         |         |       |         |  |  | 9A    | 0.37  | 369436   | Solyc09g005550 | -              | - |
| 146 | solcap_snp_sl_14679                | ch09 | IL9.1.2 | IL9.1   | IL9.1.3 |         |         |       |         |  |  | 9A/9B | 0.74  | 743707   | Solyc09g007100 | -              | - |
| 147 | solcap_snp_sl_57946                | ch09 | IL9.1.2 | IL9.1   | IL9.1.3 |         |         |       |         |  |  | 9B    | 1.69  | 1692427  | Solyc09g008240 | -              | - |

|     |                                    |      |         |          |         |          |         |         |         |         |       |          |                |                |   |
|-----|------------------------------------|------|---------|----------|---------|----------|---------|---------|---------|---------|-------|----------|----------------|----------------|---|
| 148 | CL017729-0357_solcap_snp_sl_100626 | ch09 | IL9.1.2 | IL9.1    | IL9.1.3 |          |         |         |         | 9B/9C   | 1.98  | 1981919  | Solyc09g008490 | -              |   |
| 149 | solcap_snp_sl_39857                | ch09 |         | IL9.1    | IL9.1.3 |          |         |         |         | 9C      | 2.19  | 2194152  | Solyc09g008770 | -              |   |
| 150 | solcap_snp_sl_26678                | ch09 |         | IL9.1    | IL9.1.3 | IL9.2.5  | IL9.2   |         |         | 9C/9D   | 2.41  | 2411368  | Solyc09g009080 | -              |   |
| 151 | solcap_snp_sl_39790                | ch09 |         | IL9.1    | IL9.1.3 | IL9.2.5  | IL9.2   |         |         | 9D      | 3.01  | 3014917  | -              | Solyc09g009600 |   |
| 152 | solcap_snp_sl_39725                | ch09 |         | IL9.1    | IL9.1.3 | IL9.2.5  | IL9.2   |         |         | 9D/9E   | 3.48  | 3477979  | Solyc09g010080 | -              |   |
| 153 | CL017345-0677_solcap_snp_sl_100546 | ch09 |         | IL9.1    | IL9.1.3 |          | IL9.2   |         |         | 9E      | 4.05  | 4050706  | Solyc09g010740 | -              |   |
| 154 | solcap_snp_sl_39515                | ch09 |         | IL9.1    | IL9.1.3 |          | IL9.2   |         |         | 9E/9F   | 4.56  | 4561644  | Solyc09g011220 | -              |   |
| 155 | solcap_snp_sl_39407                | ch09 |         |          | IL9.1.3 |          | IL9.2   |         |         | 9F      | 5.19  | 5191470  | Solyc09g011930 | -              |   |
| 156 | CL016923-0271_solcap_snp_sl_100489 | ch09 |         |          | IL9.1.3 |          | IL9.2   |         |         | 9F/9G   | 6.01  | 6011768  | Solyc09g014380 | -              |   |
| 157 | solcap_snp_sl_51520                | ch09 |         |          |         |          | IL9.2   |         |         | 9G      | 38.36 | 38363827 | Solyc09g055260 | -              |   |
| 158 | solcap_snp_sl_43215                | ch09 |         |          |         |          | IL9.2   | IL9.2.6 |         | 9G/9H   | 62.33 | 62329356 | Solyc09g064850 | -              |   |
| 159 | solcap_snp_sl_43184                | ch09 |         |          |         |          | IL9.2   | IL9.2.6 |         | 9H      | 62.68 | 62683510 | Solyc09g065010 | -              |   |
| 160 | solcap_snp_sl_43175                | ch09 |         |          |         |          | IL9.2   | IL9.2.6 |         | 9H/9I   | 62.99 | 62985276 | Solyc09g065120 | -              |   |
| 161 | solcap_snp_sl_43011                | ch09 |         |          |         |          |         | IL9.2.6 |         | 9I      | 64.53 | 64528435 | Solyc09g066120 | -              |   |
| 162 | solcap_snp_sl_46662                | ch09 |         |          |         |          | IL9.2.6 | IL9.3   |         | 9I/9J   | 66.28 | 66276116 | Solyc09g074480 | -              |   |
| 163 | solcap_snp_sl_46782                | ch09 |         |          |         |          | IL9.2.6 | IL9.3   |         | 9J      | 66.93 | 66926136 | Solyc09g075120 | -              |   |
| 164 | solcap_snp_sl_46828                | ch09 |         |          |         |          | IL9.2.6 | IL9.3   |         | 9J/9K   | 67.07 | 67068484 | Solyc09g075350 | -              |   |
| 165 | solcap_snp_sl_3430                 | ch09 |         |          |         |          |         | IL9.3   |         | 9K      | 67.69 | 67687663 | Solyc09g076000 | -              |   |
| 166 | SGN-U320210_C2_At1g04190_snp253    | ch09 |         |          |         |          |         | IL9.3   | IL9.3.1 | IL9.3.2 | 9K/9L | 68.26    | 68260072       | Solyc09g082540 | - |
| 167 | solcap_snp_sl_25723                | ch09 |         |          |         |          |         | IL9.3   | IL9.3.1 | IL9.3.2 | 9L    | 69.86    | 69863659       | Solyc09g090350 | - |
| 168 | solcap_snp_sl_22329                | ch09 |         |          |         |          |         | IL9.3   | IL9.3.1 | IL9.3.2 | 9L/9M | 70.84    | 70836949       | Solyc09g091580 | - |
| 169 | solcap_snp_sl_69978                | ch09 |         |          |         |          |         | IL9.3   | IL9.3.1 |         | 9M    | 71.64    | 71641196       | Solyc09g092640 | - |
| 170 | solcap_snp_sl_63588                | ch09 |         |          |         |          |         | IL9.3   | IL9.3.1 |         | 9M    | 72.38    | 72380672       | Solyc09g098590 | - |
| 171 | solcap_snp_sl_45992                | ch10 | IL10.1  |          |         |          |         |         |         | 10A     | 0.05  | 49125    | Solyc10g005040 | -              |   |
| 172 | solcap_snp_sl_29033                | ch10 | IL10.1  |          |         |          |         |         |         | 10A     | 33.20 | 33200066 | -              | Solyc10g045390 |   |
| 173 | solcap_snp_sl_33007                | ch10 | IL10.1  |          | IL10.2  |          |         |         |         | 10A/10B | 60.49 | 60491093 | -              | Solyc10g078790 |   |
| 174 | solcap_snp_sl_8260                 | ch10 |         |          | IL10.2  |          |         |         |         | 10B     | 60.66 | 60664352 | Solyc10g079010 | -              |   |
| 175 | solcap_snp_sl_20256                | ch10 |         |          | IL10.2  |          |         |         |         | 10B/10C | 60.99 | 60987253 | Solyc10g079450 | -              |   |
| 176 | SGN-U317657_C2_At3g47930_snp417    | ch10 |         |          |         |          |         |         |         | 10C/10D | 61.02 | 61017028 | Solyc10g079470 | -              |   |
| 177 | solcap_snp_sl_59259                | ch10 |         | IL10.1.1 | IL10.2  | IL10.2.2 |         |         |         | 10D     | 62.01 | 62007607 | Solyc10g080810 | -              |   |
| 178 | solcap_snp_sl_59474                | ch10 |         | IL10.1.1 | IL10.2  | IL10.2.2 |         |         |         | 10D/10E | 62.74 | 62741784 | Solyc10g081720 | -              |   |
| 179 | solcap_snp_sl_59494                | ch10 |         |          | IL10.2  |          |         |         |         | 10E     | 62.81 | 62813840 | -              | Solyc10g081860 |   |
| 180 | solcap_snp_sl_33805                | ch10 |         |          | IL10.2  |          | IL10.3  |         |         | 10E/10F | 62.98 | 62982634 | Solyc10g083110 | -              |   |
| 181 | CL017176-0241_solcap_snp_sl_100516 | ch10 |         |          | IL10.2  |          | IL10.3  |         |         | 10F     | 63.68 | 63678125 | Solyc10g084000 | -              |   |
| 182 | solcap_snp_sl_60817                | ch10 |         |          | IL10.2  |          | IL10.3  |         |         | 10F/10G | 64.76 | 64760912 | Solyc10g085640 | -              |   |
| 183 | solcap_snp_sl_60745                | ch10 |         |          |         |          | IL10.3  |         |         | 10G     | 65.01 | 65011189 | Solyc10g086030 | -              |   |
| 184 | solcap_snp_sl_60643                | ch10 |         |          |         |          | IL10.3  |         |         | 10G     | 65.46 | 65462812 | -              | Solyc10g086700 |   |
| 185 | solcap_snp_sl_9452                 | ch11 | IL11.1  |          |         |          |         |         |         | 11A     | 0.06  | 57631    | Solyc11g005060 | -              |   |
| 186 | solcap_snp_sl_66431                | ch11 | IL11.1  |          |         |          |         |         |         | 11A     | 1.25  | 1347455  | Solyc11g006740 | -              |   |
| 187 | solcap_snp_sl_10594                | ch11 | IL11.1  | IL11.2   |         |          |         |         |         | 11A/11B | 2.48  | 2481288  | Solyc11g008250 | -              |   |
| 188 | solcap_snp_sl_20963                | ch11 | IL11.1  | IL11.2   |         |          |         |         |         | 11B     | 3.65  | 3652983  | Solyc11g010580 | -              |   |
| 189 | solcap_snp_sl_62695                | ch11 | IL11.1  | IL11.2   |         |          |         |         |         | 11B/11C | 4.82  | 4819599  | Solyc11g011880 | -              |   |
| 190 | solcap_snp_sl_62846                | ch11 |         | IL11.2   |         |          |         |         |         | 11C     | 5.89  | 5885686  | Solyc11g013020 | -              |   |
| 191 | solcap_snp_sl_6905                 | ch11 |         | IL11.2   | IL11.3  |          |         |         |         | 11C/11D | 7.84  | 7843871  | Solyc11g017040 | -              |   |
| 192 | solcap_snp_sl_7444                 | ch11 |         | IL11.2   | IL11.3  |          |         |         |         | 11D     | 25.02 | 25023476 | -              | Solyc11g032130 |   |
| 193 | solcap_snp_sl_31030                | ch11 |         | IL11.2   | IL11.3  |          |         |         |         | 11D/11E | 52.80 | 52804397 | Solyc11g067050 | -              |   |
| 194 | solcap_snp_sl_32030                | ch11 |         |          | IL11.3  |          |         |         |         | 11E     | 53.50 | 53502001 | Solyc11g068950 | -              |   |
| 195 | solcap_snp_sl_56104                | ch11 |         |          | IL11.3  | IL11.4   |         |         |         | 11E/11F | 54.64 | 54639039 | Solyc11g070100 | -              |   |
| 196 | solcap_snp_sl_17550                | ch11 |         |          | IL11.3  | IL11.4   |         |         |         | 11F     | 54.97 | 54970111 | Solyc11g071530 | -              |   |
| 197 | solcap_snp_sl_44882                | ch11 |         |          | IL11.3  | IL11.4   |         |         |         | 11F/11G | 55.15 | 55148073 | Solyc11g071770 | -              |   |
| 198 | solcap_snp_sl_17563                | ch11 |         |          |         | IL11.4   |         |         |         | 11G     | 55.33 | 55330360 | -              | Solyc11g072050 |   |

|     |                                                |      |          |        |        |          |          |        |          |         |       |          |                |                |
|-----|------------------------------------------------|------|----------|--------|--------|----------|----------|--------|----------|---------|-------|----------|----------------|----------------|
| 199 | solcap_snp_sl_28472                            | ch11 |          |        |        | IL11.4   | IL11.4.1 |        |          | 11G/11H | 55.58 | 55584310 | -              | Solyc11g072420 |
| 200 | solcap_snp_sl_28504                            | ch11 |          |        |        | IL11.4   | IL11.4.1 |        |          | 11H     | 55.77 | 55766807 | Solyc11g072590 | -              |
| 201 | solcap_snp_sl_17578                            | ch11 |          |        |        | IL11.4   | IL11.4.1 |        |          | 11H     | 56.25 | 56249720 | Solyc11g073200 | -              |
| 202 | solcap_snp_sl_28840                            | ch12 | IL12.1.1 | IL12.1 | IL12.2 |          |          |        |          | 12A     | 0.05  | 53649    | Solyc12g005100 | -              |
| 203 | solcap_snp_sl_3130                             | ch12 | IL12.1.1 | IL12.1 | IL12.2 |          |          |        |          | 12A     | 3.77  | 376932   | Solyc12g005700 | -              |
| 204 | solcap_snp_sl_45733                            | ch12 | IL12.1.1 | IL12.1 | IL12.2 |          |          |        |          | 12A/12B | 0.72  | 715204   | Solyc12g006170 | -              |
| 205 | solcap_snp_sl_23497                            | ch12 |          | IL12.1 | IL12.2 |          |          |        |          | 12B     | 1.34  | 1341538  | Solyc12g006920 | -              |
| 206 | solcap_snp_sl_45923                            | ch12 |          | IL12.1 | IL12.2 |          |          |        |          | 12B/12C | 1.70  | 1695254  | -              | Solyc12g007290 |
| 207 | solcap_snp_sl_41031                            | ch12 |          |        | IL12.2 |          |          |        |          | 12C     | 2.32  | 2329931  | Solyc12g009030 | -              |
| 208 | solcap_snp_sl_41162                            | ch12 |          |        | IL12.2 | IL12.3.1 | IL12.3   |        |          | 12C/12D | 3.03  | 3034418  | Solyc12g009840 | -              |
| 209 | solcap_snp_sl_63520                            | ch12 |          |        | IL12.2 | IL12.3.1 | IL12.3   |        |          | 12D     | 6.33  | 6326442  | -              | Solyc12g016200 |
| 210 | solcap_snp_sl_40598                            | ch12 |          |        | IL12.2 | IL12.3.1 | IL12.3   |        |          | 12D/12E | 8.95  | 8948057  | Solyc12g019000 | -              |
| 211 | solcap_snp_sl_52512                            | ch12 |          |        |        | IL12.3.1 | IL12.3   |        |          | 12E     | 39.99 | 39993806 | -              | Solyc12g042530 |
| 212 | solcap_snp_sl_19344                            | ch12 |          |        |        | IL12.3.1 | IL12.3   |        |          | 12E/12F | 61.86 | 61864163 | Solyc12g055850 | -              |
| 213 | solcap_snp_sl_42740                            | ch12 |          |        |        |          | IL12.3   |        |          | 12F     | 63.01 | 63006395 | Solyc12g056940 | -              |
| 214 | solcap_snp_sl_31966                            | ch12 |          |        |        |          | IL12.3   | IL12.4 |          | 12F/12G | 64.06 | 64057242 | Solyc12g088840 | -              |
| 215 | solcap_snp_sl_32776                            | ch12 |          |        |        |          | IL12.3   | IL12.4 |          | 12G     | 65.19 | 65192188 | -              | Solyc12g096170 |
| 216 | solcap_snp_sl_6568                             | ch12 |          |        |        |          | IL12.3   | IL12.4 |          | 12G/12H | 66.31 | 66305031 | Solyc12g098960 | -              |
| 217 | SGN-<br>U567105_snp715_solc<br>ap_snp_sl_31389 | ch12 |          |        |        |          |          | IL12.4 |          | 12H     | 66.65 | 66648008 | Solyc12g099530 | -              |
| 218 | SL10284_277_solcap_<br>snp_sl_10131            | ch12 |          |        |        |          |          | IL12.4 | IL12.4.1 | 12H/12I | 66.80 | 66795576 | Solyc12g099800 | -              |
| 219 | solcap_snp_sl_31342                            | ch12 |          |        |        |          |          | IL12.4 | IL12.4.1 | 12I     | 66.89 | 66885302 | Solyc12g099930 | -              |
| 220 | solcap_snp_sl_31304                            | ch12 |          |        |        |          |          | IL12.4 | IL12.4.1 | 12I     | 67.03 | 67033605 | Solyc12g100250 | -              |

Data set based on "Tomato - Kazusa and SolCAP markers mapped to genome" (Ofner et al., 2016)

<sup>a</sup> BINS described by Ofner et al. (2016).

\* New gene rearrangement in SL2.50 database

DNA markers in black have been described for every IL by Ofner et al. (2016).

DNA markers in blue have been selected herein using the SOLCAP\_SNP dataset (Ofner et al., 2016).

**Supplemental Table S2** Gene expression levels for the selected candidate genes set.

| QTLs <sup>a</sup>       | Gene ID        | Short name <sup>b</sup> | Gene expression* |                 |                |               | Exp Pat <sup>c</sup> | Diff Exp in <i>S. pen</i> <sup>d</sup> |
|-------------------------|----------------|-------------------------|------------------|-----------------|----------------|---------------|----------------------|----------------------------------------|
|                         |                |                         | Parental         | Affected ILs    |                |               |                      |                                        |
| <b>(A) - Main QTLs:</b> |                |                         |                  |                 |                |               |                      |                                        |
| <i>vicfa3.4</i> (+)     | Solyc03g117800 | CER3/WAX2               | <b>M82</b>       | <b>IL3.4</b>    | <b>IL3.5</b>   |               | Comp                 | No                                     |
| <i>amy3.4</i> (+)       | Solyc03g118540 | TIFY6B/JAZ3             | 11.87            | 4.39            | 2.55           |               | Comp                 | No                                     |
|                         |                |                         | <b>M82</b>       | <b>IL12.1.1</b> | <b>IL12.1</b>  | <b>IL12.2</b> |                      |                                        |
| <i>amy12.1</i> (-)      | Solyc12g006520 | TTS2                    | 0.14             | 8.83            | 14.77          | 0             | Comp                 | No                                     |
|                         | Solyc12g006530 | TTS1                    | 0.23             | 0.05            | 0              | 0             | Comp                 | No                                     |
|                         |                |                         | <b>M82</b>       | <b>IL8.3</b>    | <b>IL8.3.1</b> |               |                      |                                        |
| <i>ehfa8.3</i> (+)      | Solyc08g081220 | CYP86A8/LCR             | 0                | 0               | 0              |               | Incomp               | No                                     |
|                         |                |                         | <b>M82</b>       | <b>IL7.4</b>    | <b>IL7.4.1</b> | <b>IL7.5</b>  |                      |                                        |
| <i>cwr7.4.1</i> (-)     | Solyc07g056000 | XTR7                    | 30.81            | 16.27           | 6.9            | 12.91         | Comp                 | Yes                                    |
|                         | Solyc07g055990 | XTR7                    | 17.18            | 8.6             | 12.48          | 7.55          | Comp                 | No                                     |
|                         | Solyc07g056290 | PG8                     | 0                | 0               | 0              | 0             | Incomp               | No                                     |
|                         | Solyc07g055920 | TAGL1                   | 163.4            | 136.14          | 166.2          | 120.7         | Comp                 | No                                     |

\* RPKM values obtained by Illumina RNA-Seq analysis on red tomato fruits from the IL population. Data available in the transcriptome profiling of *S. pennellii* ILs experiment (<http://ted.bti.cornell.edu/>).

<sup>a</sup> Type of QTL (positive or negative; cutin- or wax-related) is described; ILs containing QTLs are also provided.

<sup>b</sup> Short name based on tomato annotation and similarity to characterized Arabidopsis homologous (see Table 2).

<sup>c</sup> Gene expression pattern. When it is increased or diminished similarly to the metabolite pattern it is considered as compatible (comp). The contrary is considered as Incompatible (Incomp).

<sup>d</sup> Differential gene expression values for *Solanum pennellii* wild parental when compared with *S. lycopersicum*. Based on Supplementary Table sd4 from Koenig et al., 2013.

## Supplemental Table S3 Gene and protein information for the selected candidate genes.

| Tomato <sup>a</sup>                                                | Gene ID          | Short name                                       | Ch <sup>b</sup> | Position <sup>b</sup> |          | Strand | Length (bp) | Protein ID         | Protein Length | id% <sup>c</sup> | Aln <sup>d</sup> | amino acid substitutions <sup>e</sup> |         |                 |
|--------------------------------------------------------------------|------------------|--------------------------------------------------|-----------------|-----------------------|----------|--------|-------------|--------------------|----------------|------------------|------------------|---------------------------------------|---------|-----------------|
|                                                                    |                  |                                                  |                 | Start                 | End      |        |             |                    |                |                  |                  | Total                                 | Conserv | Non conserv     |
| <b>(A) Main QTLs:</b>                                              |                  |                                                  |                 |                       |          |        |             |                    |                |                  |                  |                                       |         |                 |
| <b><i>vicfa3.4</i> QTL (600 Kb interval containing 93 genes)</b>   |                  |                                                  |                 |                       |          |        |             |                    |                |                  |                  |                                       |         |                 |
| <i>S. lyco</i>                                                     | Solyc03g117800.2 | CER1 protein (Fragment) [AtCER3/WAX2]            | 3               | 66830213              | 66834278 | +      | 4,066       | Solyc03g117800.2.1 | 642            |                  |                  |                                       |         |                 |
| <i>S. pen</i>                                                      | Sopen03g036710   | WAX2 C-terminal domain                           | 3               | 71334247              | 71338482 | +      | 4,236       | Sopen03g036710     | 644            | 97.83            | 630/644          | 14                                    | 8       | 6 (3 ins)       |
| <b><i>amy3.4</i> QTL (410 Kb interval containing 50 genes)</b>     |                  |                                                  |                 |                       |          |        |             |                    |                |                  |                  |                                       |         |                 |
| <i>S. lyco</i>                                                     | Solyc03g118540.2 | Protein TIFY 6B [AtJAZ3]                         | 3               | 67430375              | 67433753 | +      | 3,379       | Solyc03g118540.2.1 | 326            |                  |                  |                                       |         |                 |
| <i>S. pen</i>                                                      | Sopen03g037480   | tify domain                                      | 3               | 71989456              | 71993016 | +      | 3,561       | Sopen03g037480     | 326            | 98.47            | 321/326          | 5                                     | 4       | 1               |
| <b><i>amy12.1</i> QTL (0.98 MB interval containing 111 genes)</b>  |                  |                                                  |                 |                       |          |        |             |                    |                |                  |                  |                                       |         |                 |
| <i>S. lyco</i>                                                     | Solyc12g006520.1 | SITTS2: Cycloartenol synthase (Squalene cyclase) | 12              | 1027444               | 1035605  | +      | 8,162       | Solyc12g006520.1.1 | 698            |                  |                  |                                       |         |                 |
| <i>S. pen</i>                                                      | Sopen12g002480   | Prenyltransferase and squalene oxidase           | 12              | 1125586               | 1132992  | +      | 7,407       | Sopen12g002480     | 761            | 88.94            | 619/696          | 43                                    | 30      | 13              |
| <i>S. lyco</i>                                                     | Solyc12g006530.1 | SITTS1: Cycloartenol synthase (Squalene cyclase) | 12              | 1041051               | 1049001  | +      | 7,951       | Solyc12g006530.1.1 | 762            |                  |                  |                                       |         |                 |
| <i>S. pen</i>                                                      | Sopen12g002480   | Prenyltransferase and squalene oxidase           | 12              | 1125586               | 1132992  | +      | 7,407       | Sopen12g002480     | 761            | 98.69            | 751/761          | 10                                    | 7       | 3               |
| <b><i>ehfa8.3</i> QTL (540 Kb interval containing 200 genes)</b>   |                  |                                                  |                 |                       |          |        |             |                    |                |                  |                  |                                       |         |                 |
| <i>S. lyco</i>                                                     | Solyc08g081220.1 | Fatty acid w-1 hydroxylase [AtCYP86A8]           | 8               | 64280043              | 64281707 | -      | 1,665       | Solyc08g081220.1.1 | 555            |                  |                  |                                       |         |                 |
| <i>S. pen</i>                                                      | Sopen08g029530   | Cytochrome P450                                  | 8               | 68842033              | 68844661 | -      | 2,629       | Sopen08g029530     | 554            | 98.92            | 548/554          | 6                                     | 5       | 1               |
| <b><i>cwr7.4.1</i> QTL (2.18 MB interval containing 263 genes)</b> |                  |                                                  |                 |                       |          |        |             |                    |                |                  |                  |                                       |         |                 |
| <i>S. lyco</i>                                                     | Solyc07g056000.2 | Xyloglucan endotransglucosylase/hydrolase 7      | 7               | 63901549              | 63902824 | +      | 1,276       | Solyc07g056000.2.1 | 288            |                  |                  |                                       |         |                 |
| <i>S. pen</i>                                                      | Sopen07g029350   | Glycosyl hydrolases family 16                    | 7               | 74966267              | 74967531 | +      | 1,265       | Sopen07g029350     | 287            | 99.65            | 286/287          | 1                                     | 0       | 1               |
| <i>S. lyco</i>                                                     | Solyc07g055990.2 | Xyloglucan endotransglucosylase/hydrolase 7      | 7               | 63891570              | 63893537 | +      | 1,968       | Solyc07g055990.2.1 | 291            |                  |                  |                                       |         |                 |
| <i>S. pen</i>                                                      | Sopen07g029340   | Glycosyl hydrolases family 16                    | 7               | 74961337              | 74963344 | +      | 2,008       | Sopen07g029340     | 290            | 98.62            | 286/290          | 4                                     | 2       | 2               |
| <i>S. lyco</i>                                                     | Solyc07g056290.1 | Polygalacturonase 8 (pectinase)                  | 7               | 64146906              | 64150487 | +      | 3,582       | Solyc07g056290.1.1 | 402            |                  |                  |                                       |         |                 |
| <i>S. pen</i>                                                      | Sopen07g029650   | Glycosyl hydrolases family 28                    | 7               | 75225990              | 75229581 | +      | 3,592       | Sopen07g029650     | 370            | 90.77            | 364/401          | 37                                    | 2       | 35 (31 del)     |
| <i>S. lyco</i>                                                     | Solyc07g055920.2 | Agamous MADS-box transcription factor (TAGL1)    | 7               | 63841344              | 63851220 | +      | 9,877       | Solyc07g055920.2.1 | 268            |                  |                  |                                       |         |                 |
| <i>S. pen</i>                                                      | Sopen07g029280   | K-box region                                     | 7               | 74909447              | 74919285 | +      | 9,839       | Sopen07g029280     | 265            | 97.40            | 262/269          | 7                                     | 0       | 7 (2 ins/4 del) |

<sup>a</sup> Tomato species: cultivated tomato (*Solanum lycopersicum*) and wild tomato (*S. pennellii*)

<sup>b</sup> Ch - chromosome

<sup>c</sup> Data obtained from tomato database SL2.50 (<http://www.solgenomics.net/>)

<sup>d</sup> id% - percentage of identity between *S. lyco* and *S. pen* proteins obtained by blastp (<http://www.solgenomics.net/>).

<sup>e</sup> Aln - Protein alignment level: No of conserved amino acids / total of amino acids aligned.

Kb, Kilo bases, MB, Million Bases
